# Supplementary material
Source: PubMed Central journal article supplement (PMC2838449)
Supplement: NIHMS180497-supplement-Supplemental.pdf [file NIHMS180497-supplement-Supplemental.pdf]

## Supporting Information

### **Small molecule inhibitors target *E. coli* amyloid biogenesis and biofilm formation**

Lynette Cegelski<sup>1,2,6</sup>, Jerome S. Pinkner<sup>1,6</sup>, Neal D. Hammer<sup>3</sup>, Corinne K. Cusumano<sup>1</sup>, Chia S. Hung<sup>1</sup>, Erik Chorell<sup>4</sup>, Veronica Åberg<sup>4</sup>, Jennifer N. Walker<sup>1</sup>, Patrick C. Seed<sup>5</sup>, Fredrik Almqvist<sup>4‡</sup>, Matthew R. Chapman<sup>3‡</sup>, and Scott J. Hultgren<sup>1‡</sup>

<sup>1</sup> Department of Molecular Microbiology, Washington University School of Medicine, 660 S. Euclid Ave., St. Louis, MO 63110, USA

<sup>2</sup> Department of Molecular, Cellular and Developmental Biology, University of Michigan, 830 North University, Ann Arbor, MI, 48109-1048, USA

<sup>3</sup> Department of Chemistry, Umeå University, SE-90187 Umeå, Sweden

<sup>4</sup> Department of Chemistry, Stanford University, Stanford, CA 94305-5080, USA

<sup>5</sup> Departments of Pediatrics and Molecular Genetics and Microbiology, Duke University School of Medicine, Durham, NC 27710, USA.

<sup>6</sup> These authors contributed equally to this work.

#### **This file includes:**

Supplementary Methods  
Supplementary Figures

## Supplementary Methods

### Synthesis of ring-fused 2 pyridones

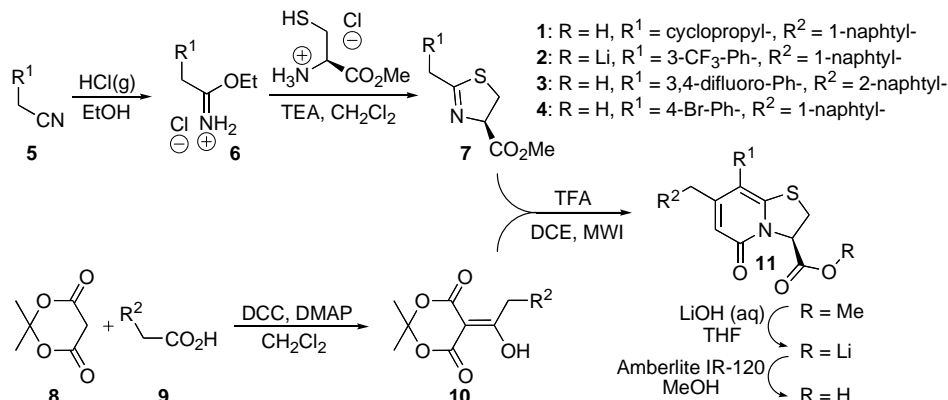

General procedure for the preparation of **7**:

**5** was dissolved in dry EtOH (0.1 mL/mmol) (in some cases small amounts of CH<sub>2</sub>Cl<sub>2</sub> was added because of solubility problems). Dry HCl(g) was bubbled through the solution for approximately 2 h before the reaction mixture was concentrated. The resulting imino ether (**6**) (1 mol equiv.) and cysteine methyl ester hydrochloride (1 mol equiv.) was dissolved in dry CH<sub>2</sub>Cl<sub>2</sub> (1.6 mL/mmol) at 0 °C. After 15 min of stirring triethylamine (TEA) (1 mol equiv.) was added dropwise at 0 °C and the suspension was left stirring over night. The reaction mixture was washed with water/brine (1/1) and the aqueous phase was extracted three times with CH<sub>2</sub>Cl<sub>2</sub>. The combined organic phases was dried with Na<sub>2</sub>SO<sub>4</sub>, filtrated and concentrated. Purification by column chromatography in heptane/ethylacetate gave **7**.

General procedure for the preparation of **10**:

**9** (1 mol equiv.) and DCC (1.15 mol equiv.) dissolved in CH<sub>2</sub>Cl<sub>2</sub> (8 mL/mmol) was stirred for 30 min at 0 °C before **8** (1.1 mol equiv.) and DMAP (1.6 mol equiv.) were added. The suspension was allowed to stir over night before being quenched by 6% aq. KHSO<sub>4</sub>. The resulting urea precipitation was filtered off and the filtrate was washed 2 times with 6% aq. KHSO<sub>4</sub>. The organic phase was dried with Na<sub>2</sub>SO<sub>4</sub>, filtrated and concentrated to give **10** that normally was used without further purification.

General procedure for the preparation of **11**:

To **7** (1 mol equiv.) and **10** (3 mol equiv.) dissolved in 1,2-dichloroethane (DCE)(5 mL/mmol) was trifluoroacetic acid (TFA)(1 mol equiv.) added dropwise. The solution was stirred for 5 min before heated by microwave irradiation (MWI) for 2 min and 20 s at 120 °C. The resulting solution was washed with NaHCO<sub>3</sub> (1/2 sat.) and brine, dried with Na<sub>2</sub>SO<sub>4</sub>, filtrated and concentrated. Purified by column chromatography in heptane/ethylacetate gave **11**.

General procedure for the hydrolysis of **11**:

**11** (1 mol equiv.) was dissolved in tetrahydrofuran (THF) (40 mL/mmol) and 0.1 M aq. LiOH (1 mol equiv.) was added dropwise. The solution was left stirring over night before being concentrated to give the corresponding lithium carboxylate. If desired, the lithium carboxylate

could be protonated to its corresponding carboxylic acid by treatment with Amberlite IR-120 (H<sup>+</sup>) in MeOH, followed by filtration and concentration.

### 1

(3R)-8-cyclopropyl-7-(naphthalen-1-ylmethyl)-5-oxo-3,5-dihydro-2H-thiazolo[3,2-a]pyridine-3-carboxylic acid.

Characterization of **1** and intermediates agreed with previously reported data<sup>1</sup>.

### 2

lithium (3R)-7-(naphthalen-1-ylmethyl)-5-oxo-8-(3-(trifluoromethyl)phenyl)-3,5-dihydro-2H-thiazolo[3,2-a]pyridine-3-carboxylate.

Characterization of **2** and intermediates agreed with previously reported data<sup>2</sup>.

### 3

(3R)-8-(3,4-difluorophenyl)-7-(naphthalen-2-ylmethyl)-5-oxo-3,5-dihydro-2H-thiazolo[3,2-a]pyridine-3-carboxylic acid.

Characterization of **3** and intermediates agreed with previously reported data<sup>1</sup>.

### 4

(3R)-8-(4-bromophenyl)-7-(naphthalen-1-ylmethyl)-5-oxo-3,5-dihydro-2H-thiazolo[3,2-a]pyridine-3-carboxylic acid. <sup>1</sup>H NMR (400 MHz, DMSO-d<sub>6</sub>) 7.88-7.96 (m, 1H), 7.80-7.86 (m, 1H), 7.67-7.74 (m, 1H), 7.58-7.66 (m, 2H), 7.24-7.53 (m, 6H), 5.43-5.49 (m, 2H), 3.99 (s, 2H), 3.83 (dd, J = 11.94, 9.07 Hz, 1H), 3.50 (dd, J = 11.97, 1.50 Hz, 1H); <sup>13</sup>C NMR (100 MHz, DMSO-d<sub>6</sub>) 169.4, 159.9, 153.4, 148.0, 135.4, 134.0, 133.3, 132.3 (broad, 2C), 131.9 (2C), 131.3, 128.6, 127.6, 127.4, 126.3, 125.8, 125.5, 123.8, 121.6, 113.7, 113.2, 63.3, 35.8, 31.4. MS (ES<sup>+</sup>) calcd for [M+H]<sup>+</sup> C<sub>25</sub>H<sub>18</sub>BrNO<sub>3</sub>S 492/494, obsd 492/494.

Characterization of intermediates agreed with previously reported data<sup>1,3</sup>.

## UTI89Δ*csgA*, UTI89Δ*csgA/pLR5*, and UTI89Δ*csgA/pLR5* construction, UTI89Δ*ABG*

UTI89Δ*csgA* was constructed according to the method of Datsenko and Wanner<sup>4</sup>. A linear knockout product was produced by PCR using the template pKD4 and the following primers with homologous ends specific to *csgA*: 5'-ATGAAACTTTTAAAAGTAGCAGCAATTGCAGCAATCG TATTCTCTGGTAGCATATGAATATCCTCCTTAG and 5'-TTAGTACTGATGAGCGGTCGCGTTGTTACCAA GCCAACCTGAGTGACGTGTGTAGGCTGGAGCTGCTTC. Gene deletion was confirmed with the *csgA*-flanking primers 5'-TGGCTATTCGCGTGACACAA and 5'-GGCTTGCGCCCTGTTTCTT. The kanamycin cassette was excised by introduction of the Flp recombinase-expressing vector pCP20<sup>4</sup>. Subsequent passage at 42°C eliminated the temperature sensitive replicon of pCP20.

The *csgA* expressing plasmid construct pLR5 was previously described<sup>5</sup>. pLR1 was constructed by inserting only the *csgBA* promoter in plasmid pACYC177<sup>6</sup>.

Each plasmid was introduced in the UTI89Δ*csgA* via electroporation and selected on antibiotic.

UTI89  $\Delta csgBG$  was created through P1 phage transduction of a *csgB-csgG* deletion construct according to standard protocol. Briefly, P1 phage lysate was generated from MHR420<sup>7</sup>. Overnight culture of UTI89 was then infected with MHR420 P1 phage lysate and selected on LB agar plates containing 20  $\mu$ g/ml chloramphenicol.

### ***Curli promoter-gfp transcriptional fusion construction***

PCR primers *csg* #1 (TTATAGGATCCGTTTTCTGCTCAAAGTATCC) and *csg* #2 (ATTATGGATCCTGCGCAACAACCGCCAAAAG) were used to amplify a 1207 bp product from the genome of the prototypical cystitis strain UTI89, including the intergenic region between the *csgD* and *csgB* genes. This region contains all of the described regulatory regions involved in *csgBA* transcription. The BamHI-cut product was ligated into the like-cut integration vector pSSH10 containing a promoterless *gfp*. A clone in which the *csgBA* promoter fragment was oriented to direct *gfp* transcription was selected, confirmed by sequencing, and integrated into the lambda site of *E. coli* MG1655 as previously described<sup>8</sup>. The integrated reporter was subsequently transferred into UPEC UTI89 by P1 phage generalized transduction.

### **References**

1. Emtenas, H., Ahlin, K., Pinkner, J. S., Hultgren, S. J. & Almqvist, F. Design and parallel solid-phase synthesis of ring-fused 2-pyridinones that target pilus biogenesis in pathogenic bacteria. *J Comb Chem* **4**, 630-9 (2002).
2. Aberg, V. et al. Microwave-assisted decarboxylation of bicyclic 2-pyridone scaffolds and identification of Abeta-peptide aggregation inhibitors. *Org Biomol Chem* **3**, 2817-23 (2005).
3. Aberg, V., Bostrom, D., Fischer, A. & Almqvist, F. Synthesis and absolute configuration of methyl (-)-(3R)-8-(4-bromophenyl)-7-(naphthalen-1-ylmethyl)-5-oxo-2,3-dihydro-5H-thiazolo[3,2-a]pyridine-3-carboxylate. *Acta Crystallographica Section E* **58**, o812-o814 (2002).
4. Datsenko, K. A. & Wanner, B. L. One-step inactivation of chromosomal genes in *Escherichia coli* K-12 using PCR products. *Proc Natl Acad Sci U S A* **97**, 6640-5 (2000).
5. Wang, X. & Chapman, M. R. Sequence determinants of bacterial amyloid formation. *J Mol Biol* **380**, 570-80 (2008).
6. Robinson, L. S., Ashman, E. M., Hultgren, S. J. & Chapman, M. R. Secretion of curli fibre subunits is mediated by the outer membrane-localized CsgG protein. *Mol Microbiol* **59**, 870-81 (2006).
7. Loferer, H., Hammar, M. & Normark, S. Availability of the fibre subunit CsgA and the nucleator protein CsgB during assembly of fibronectin-binding curli is limited by the intracellular concentration of the novel lipoprotein CsgG. *Mol Microbiol* **26**, 11-23 (1997).
8. Wright, K. J., Seed, P. C. & Hultgren, S. J. Uropathogenic *Escherichia coli* Flagella Aid in Efficient Urinary Tract Colonization. *Infect Immun* **73**, 7657-7668 (2005).

## Supplementary Figures

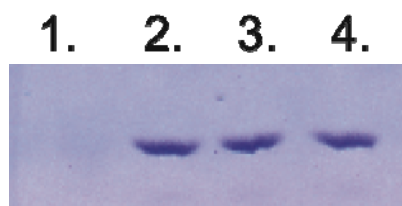

**Figure S1.** Inhibition of A $\beta$  protein polymerization by BibC6 and VA028 demonstrated in a polyacrylamide gel-shift assay. A $\beta$  peptide 1-40 was dissolved in 50 mM phosphate, 100mM NaCl, pH 6.8, and was incubated for 24 hours at 37 °C with agitation. All substances were dissolved in DMSO at a final concentration corresponding to 5% (V/V) and incubated at a 1:10 ratio (peptide:substance). Aggregated material was precipitated through centrifugation to discriminate between aggregated and non-aggregated protein. The SDS PAGE gel indicates the presence of peptide in the supernatant after centrifugation. **1.** Control (verifying 100% aggregation); **2** VA028; **3.** BibC6; **4.** FN075; (positive control).

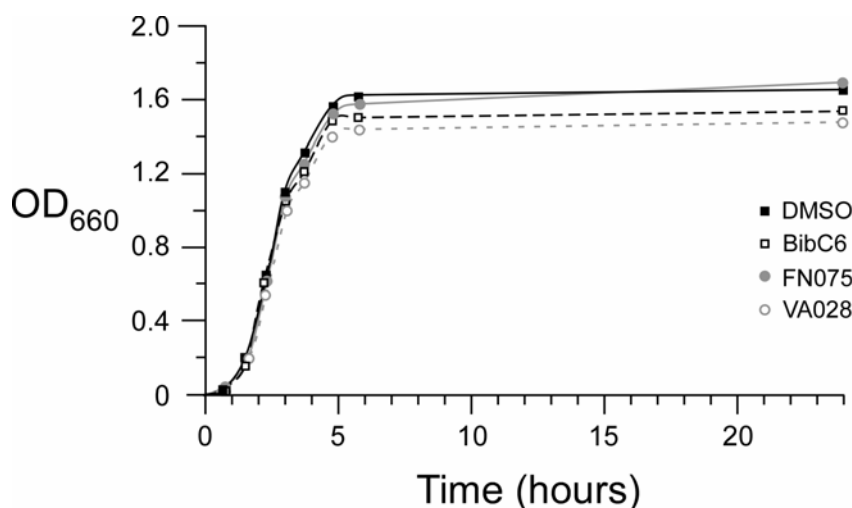

**Figure S2.** UTI89 growth curves in the presence of DMSO carrier and curlicides. Curlicides had no effect on growth rates of UTI89 when media was amended with 400  $\mu$ M of each curlicide, relative to cells grown in an equivalent volume of DMSO. Bacteria were grown in LB broth at 37 °C with a shaking speed of 250 rpm for 24 hours. Optical densities as a function of time were measured spectrophotometrically at 660 nm.
